# Supplementary material for: Sociodemographic and psychological characteristics influencing patients’ willingness to participate in clinical trials
Source: PubMed Central journal article supplement — BMJ Open Qual. 2022 Oct 31;11(4):e002044. doi: 10.1136/bmjoq-2022-002044 (PMC9628668; doi:10.1136/bmjoq-2022-002044), 2022-10-31
Supplement: bmjoq-2022-002044supp001.pdf [file bmjoq-2022-002044supp001.pdf]

**Table S1.** Distribution of patients according to therapeutic indication and socio-demographic characteristics of patients who accepted (Group 1) and refused (Group 2) to participate in a clinical trial.

|                                                 | Group 1<br>(N=80) | Group 2 (N=20) | p-value     |
|-------------------------------------------------|-------------------|----------------|-------------|
| <b>Distribution of patients, n (%)</b>          |                   |                |             |
| Cardiology, n (%)                               | 8 (10.0%)         | 1 (5.0%)       |             |
| Myocardial infarction                           | 8 (10.0%)         | 1 (5.0%)       |             |
| Dermatology, n (%)                              | 3 (3.75%)         | 1 (5.0%)       |             |
| Hidradenitis suppurativa                        | 3 (3.75%)         | 1 (5.0%)       |             |
| Endocrinology, n (%)                            | 14 (17.50%)       | 3 (15.0%)      |             |
| Diabetes mellitus                               | 7 (8.75%)         | 3 (15.0%)      |             |
| Hypoparathyroidism                              | 7 (8.75%)         | 0 (0.0%)       |             |
| Gynecology, n (%)                               | 3 (3.75%)         | 0 (0.0%)       |             |
| Contraception                                   | 3 (3.75%)         | 0 (0.0%)       |             |
| Neurology, n (%)                                | 46 (57.50%)       | 14 (70.0%)     |             |
| Migraine                                        | 5 (6.25%)         | 0 (0.0%)       |             |
| Multiple sclerosis                              | 1 (1.25%)         | 0 (0.0%)       |             |
| Refractory epilepsy                             | 1 (1.25%)         | 0 (0.0%)       |             |
| Stroke                                          | 39 (48.75%)       | 14 (70.0%)     |             |
| Oncology, n (%)                                 | 6 (7.50%)         | 1 (5.0%)       |             |
| Breast cancer                                   | 3 (3.75%)         | 0 (0.0%)       |             |
| Colorectal cancer                               | 0 (0.0%)          | 1 (5.0%)       |             |
| Gastrointestinal cancer                         | 1 (1.25%)         | 0 (0.0%)       |             |
| Lymphoma                                        | 1 (1.25%)         | 0 (0.0%)       |             |
| Pancreatic cancer                               | 1 (1.25%)         | 0 (0.0%)       |             |
| <b>Socio-demographic characteristics, n (%)</b> |                   |                |             |
| <b>Age (years), median (IQR)</b>                | 64 (18.2)         | 68 (11.2)      | <b>.028</b> |
| <b>Gender, n (%)</b>                            |                   |                | 1.00        |
| Male                                            | 42 (52.5%)        | 10 (50.0%)     |             |
| Female                                          | 38 (47.5%)        | 10 (50.0%)     |             |
| <b>Habits, n (%)</b>                            |                   |                |             |
| Smoking                                         | 17 (21.3%)        | 3 (15.0%)      | .76         |
| Coffee intake                                   | 57 (71.3%)        | 12 (60.0%)     | .48         |
| Alcohol consumption                             | 35 (43.8%)        | 5 (25.0%)      | .20         |
| Physical activity                               | 43 (53.8%)        | 10 (50.0%)     | .96         |
| <b>Employment Status, n (%)</b>                 |                   |                | .21         |
| Employed                                        | 31 (38.75%)       | 8 (40.0%)      |             |
| Unemployed                                      | 6 (7.5%)          | 4 (20.0%)      |             |
| Retired                                         | 42 (52.5%)        | 8 (40.0%)      |             |
| <b>Monthly Income, n (%)</b>                    |                   |                | .72         |
| <250€                                           | 7 (8.75%)         | 3 (15.0%)      |             |
| 250-500€                                        | 22 (27.5%)        | 3 (15.0%)      |             |
| 501-1000€                                       | 30 (37.5%)        | 10 (50.0%)     |             |
| 1001-1500€                                      | 8 (10.0%)         | 2 (10.0%)      |             |
| 1501-2500€                                      | 3 (3.75%)         | 1 (5.0%)       |             |
| <b>Academic Qualifications, n (%)</b>           |                   |                | .16         |
| 4 years                                         | 30 (37.5%)        | 11 (55.0%)     |             |
| 6 years                                         | 10 (12.5%)        | 0 (0.0%)       |             |
| 9 years                                         | 14 (17.5%)        | 6 (30.0%)      |             |
| 12 years                                        | 14 (17.5%)        | 2 (10.0%)      |             |
| Bachelor                                        | 3 (3.75%)         | 0 (0.0%)       |             |
| Master or equivalent educational level          | 8 (10.0%)         | 1 (5.0%)       |             |
| PhD                                             | 1 (1.25%)         | 0 (0.0%)       |             |

Abbreviation: IQR, interquartile range.
